# Supplementary material for: Brain phosphorylation of MeCP2 at serine 164 is developmentally regulated and globally alters its chromatin association
Source: PubMed Central journal article supplement (PMC4915018; doi:10.1038/srep28295), 2016-06-21
Supplement: srep28295-s1.pdf [file srep28295-s1.pdf]

**Supplementary Information for**

**Brain phosphorylation of MeCP2 at serine 164 is  
developmentally regulated and globally alters its  
chromatin association**

Gilda Stefanelli<sup>1</sup>, Anna Gandaglia<sup>1</sup>, Mario Costa<sup>2</sup>, Manjinder S. Cheema<sup>3</sup>,  
Daniele Dimarino<sup>4</sup>, Isabella Barbiero<sup>5</sup>, Charlotte Kilstrup-Nielsen<sup>5</sup>, Juan  
Ausio<sup>3</sup> and Nicoletta Landsberger<sup>\*,1,6</sup>

<sup>1</sup>San Raffaele Rett Research Unit, San Raffaele Scientific Institute, Milan,  
Italy

<sup>2</sup>Institute of Neuroscience, National research council (CNR), Scuola Normale  
Superiore Pisa, Italy

<sup>3</sup>Department of Biochemistry and Microbiology, University of Victoria, Victoria  
(BC), Canada

<sup>4</sup>Department of Informatics, Institute of Computational Science, Università  
della Svizzera Italiana, Lugano, Switzerland

<sup>5</sup>Department of Biotechnology and Life Sciences, University of Insubria, Busto  
Arsizio (VA), Italy

<sup>6</sup>Department of Medical Biotechnology and Translational Medicine, University  
of Milan, Milan, Italy

\* corresponding author

## qPCR

Total RNA was harvested using Trizol reagent (Sigma), 1 ml for 200.000 cells following instructions. RNA concentration was quantified with NanoDrop (Thermo Scientific) and its quality verified through gel electrophoresis. 250 ng of RNA were reverse transcribed using the RT<sup>2</sup> First Strand Kit (QIAGEN). qPCRs were performed using SYBR green (Life Tech.) as fluorescent dye.

Used primers were:

hMeCP2 FF 5'-TGGGAAGCTCCTTGTC AAGAT-3'

hMeCP2 Rev 5'-TCGGATAGAAGACTCCTTCACG-3'.

18S FF 5'-GTAACCCGTTGAACCCATT-3'

18S Rev 5'-CCATCCAATCGGTAGTAGCG-3'

Fig. S1

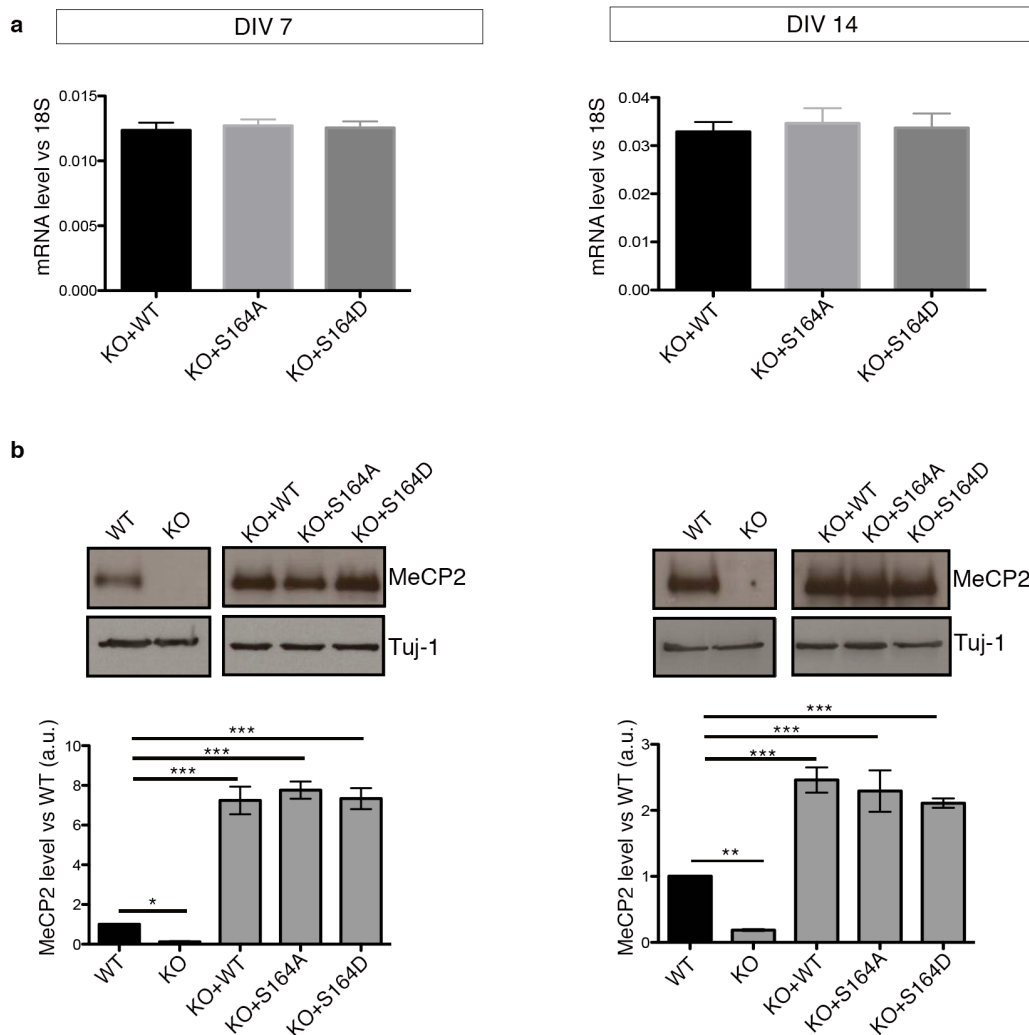

**Fig. S1:** For each experiment performed in Fig. 8, MeCP2 expression was carefully analyzed by extracting total proteins and RNAs. **(a)** Real time PCR analyses. The mRNA levels of human MeCP2 were normalized to 18S control (data are represented as mean  $\pm$  SEM. \* $p$  < 0.05, \*\* $p$  < 0.01, \*\*\* $p$  < 0.001, \*\*\*\* $p$  < 0.0001, one way ANOVA  $n$  = 4). **(b)** Western blot analysis of exogenously expressed MeCP2 derivatives at DIV7 and 14 (upper panels) using antibodies against total MeCP2. Tuj-1 was used as loading control. Lower panels show quantification of western blots (data are represented as

mean  $\pm$  SEM, \* $p$ <0.05, \*\* $p$ <0.01, \*\*\* $p$ <0.001, \*\*\*\* $p$ <0.0001, one way ANOVA,  $n$ =3).

Fig. S2

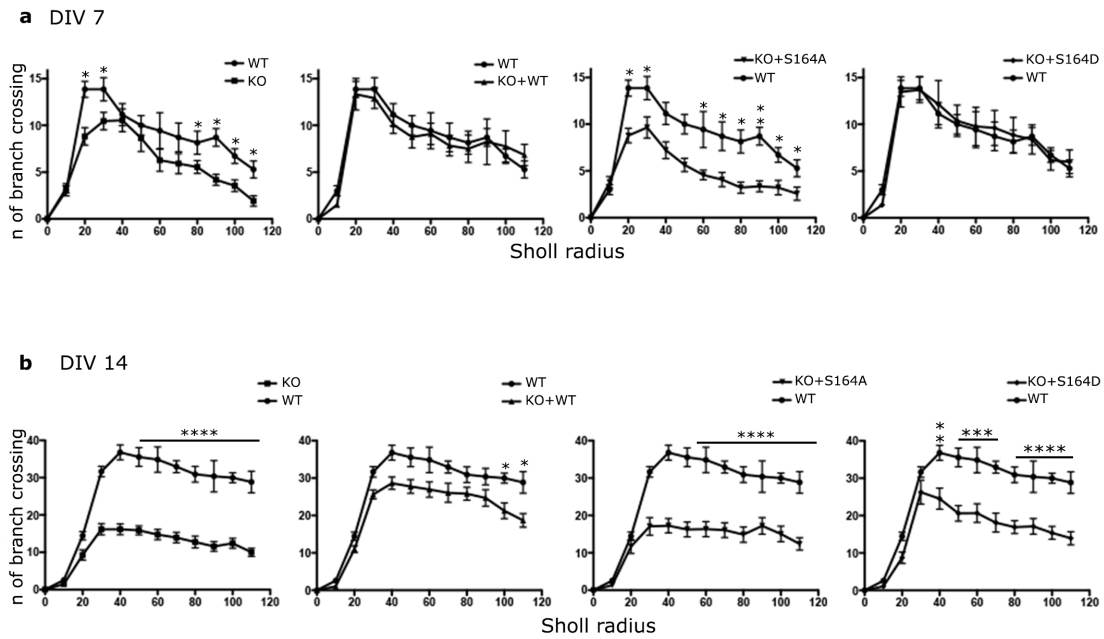

**Supplementary Fig. S2: (a,b)** Quantification of dendritic branch complexity by Sholl analysis at DIV7 (a) and 14 (b). All graphs report each condition compared to WT neurons for each time (data are represented as mean  $\pm$  SEM, \* $p$ <0.05, \*\* $p$ <0.01, \*\*\* $p$ <0.001, \*\*\*\* $p$ <0.0001, one way ANOVA)(three animals per genotype; at least 20 neurons per condition).
